# Supplementary material for: Protein Subcellular Relocalization in the Evolution of Yeast Singleton and Duplicate Genes
Source: PubMed Central journal article supplement — Genome Biol Evol. 2009 Jul 22;1:198–204. doi: 10.1093/gbe/evp021 (PMC2817416; doi:10.1093/gbe/evp021), 2009-07-22
Supplement: evp021_3.pdf [file evp021_3.pdf]

Table S1. Duplicates do not relocalize significantly more frequently than singletons in any Gene Ontology (GO) category.

|                    | GO <sup>1</sup> | Term                   | One-to-one orthologs       |                                                | One-to-two orthologs       |                                                | P value <sup>2</sup> |
|--------------------|-----------------|------------------------|----------------------------|------------------------------------------------|----------------------------|------------------------------------------------|----------------------|
|                    |                 |                        | # of genes in the category | Average # of localization differences per gene | # of genes in the category | Average # of localization differences per gene |                      |
| Molecular function | GO:0016787      | hydrolase activity     | 204                        | 0.81                                           | 32                         | 0.78                                           | 0.86                 |
|                    | GO:0016740      | transferase activity   | 182                        | 0.70                                           | 43                         | 0.86                                           | 0.45                 |
| Biological process | GO:0006996      | organelle organization | 327                        | 0.93                                           | 38                         | 0.61                                           | 0.17                 |
|                    | GO:0006950      | response to stress     | 144                        | 0.74                                           | 30                         | 1.17                                           | 0.06                 |
|                    | GO:0016070      | RNA metabolic process  | 343                        | 0.77                                           | 36                         | 0.61                                           | 0.45                 |
|                    | GO:0006810      | transport              | 194                        | 1.42                                           | 46                         | 1.00                                           | 0.07                 |

<sup>1</sup> GO categories with at least 30 cases of one-to-one orthologs and 30 cases of one-to-two orthologs are analyzed.

<sup>2</sup> Based on chi-square test.
