# Supplementary material for: Protein Subcellular Relocalization in the Evolution of Yeast Singleton and Duplicate Genes
Source: PubMed Central journal article supplement — Genome Biol Evol. 2009 Jul 22;1:198–204. doi: 10.1093/gbe/evp021 (PMC2817416; doi:10.1093/gbe/evp021), 2009-07-22
Supplement: evp021_4.pdf [file evp021_4.pdf]

Table S2. Duplicates do not relocalize more frequently than singletons in any protein expression-level category.

| <i>S. cerevisiae</i> protein expression level (protein molecules per cell) <sup>1</sup> | One-to-one orthologs       |                                                             | One-to-two orthologs       |                                                             | <i>P</i> value <sup>3</sup> |
|-----------------------------------------------------------------------------------------|----------------------------|-------------------------------------------------------------|----------------------------|-------------------------------------------------------------|-----------------------------|
|                                                                                         | # of genes in the category | Average # of localization differences per gene <sup>2</sup> | # of genes in the category | Average # of localization differences per gene <sup>2</sup> |                             |
| <1,230                                                                                  | 293                        | 1.04                                                        | 49                         | 1.04                                                        | 0.99                        |
| 1,230 - 2,800                                                                           | 292                        | 0.95                                                        | 49                         | 0.90                                                        | 0.90                        |
| 2,800 – 6,560                                                                           | 290                        | 0.77                                                        | 52                         | 0.87                                                        | 0.45                        |
| >6,560                                                                                  | 271                        | 0.74                                                        | 70                         | 0.51                                                        | 0.11                        |

<sup>1</sup> Protein expression level data are from Ghaemmaghami et al 2003. The whole set of one-to-one and one-to-two orthologous genes are divided into four equal-size bins based on the rank of their protein expression levels in *S. cerevisiae*.

<sup>2</sup> Between *S. cerevisiae* and *S. pombe*.

<sup>3</sup> Based on two-tailed Mann-Whitney test.
