# Supplementary figures and images for: Protein Subcellular Relocalization in the Evolution of Yeast Singleton and Duplicate Genes
Source: PubMed Central journal article supplement — Genome Biol Evol. 2009 Jul 22;1:198–204. doi: 10.1093/gbe/evp021 (PMC2817416; doi:10.1093/gbe/evp021), 2009-07-22

Figure S1

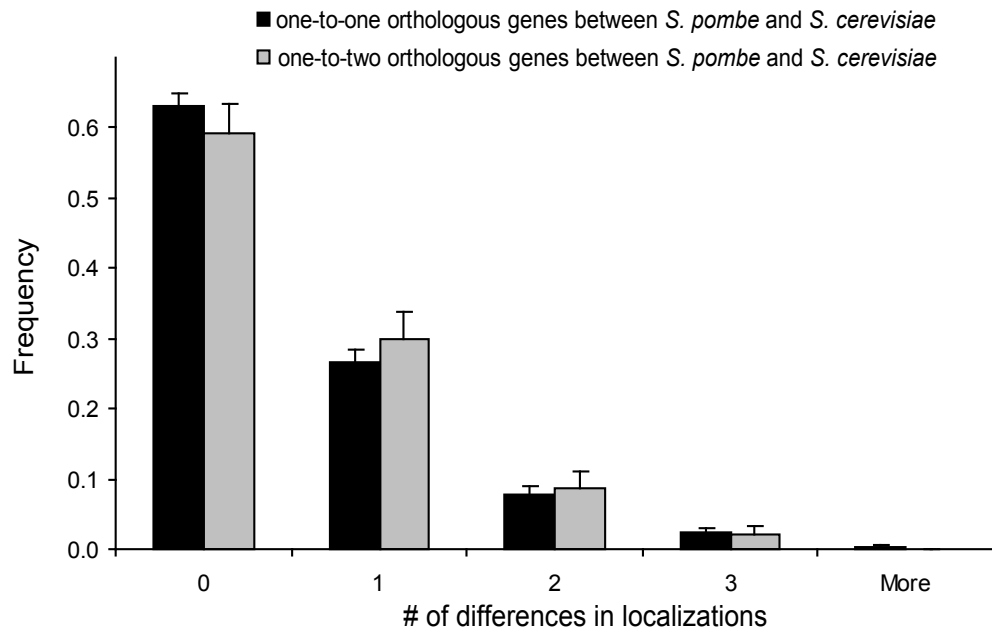

Supplement: evp021_1.pdf [file evp021_1.pdf]
